# Supplementary material
Source: PubMed Central journal article supplement (PMC6561250)
Supplement: pnas.1819583116.sapp.pdf [file pnas.1819583116.sapp.pdf]

1

## 2 **Supplementary Information for**

### 3 **Ultrafast Optical Clearing Method for Three-dimensional Imaging with Cellular Resolution**

4 **Xinpei Zhu, Limeng Huang, Yao Zheng, Yanchun Song, Qiaoqi Xu, Jiahao Wang, Ke Si, Shumin Duan and Wei Gong**

5 **Corresponding Author: Wei Gong and Ke Si**

6 **E-mail: weigong@zju.edu.cn and kesi@zju.edu.cn**

#### 7 **This PDF file includes:**

8 Figs. S1 to S5

9 Captions for Movies S1 to S4

#### 10 **Other supplementary materials for this manuscript include the following:**

11 Movies S1 to S4

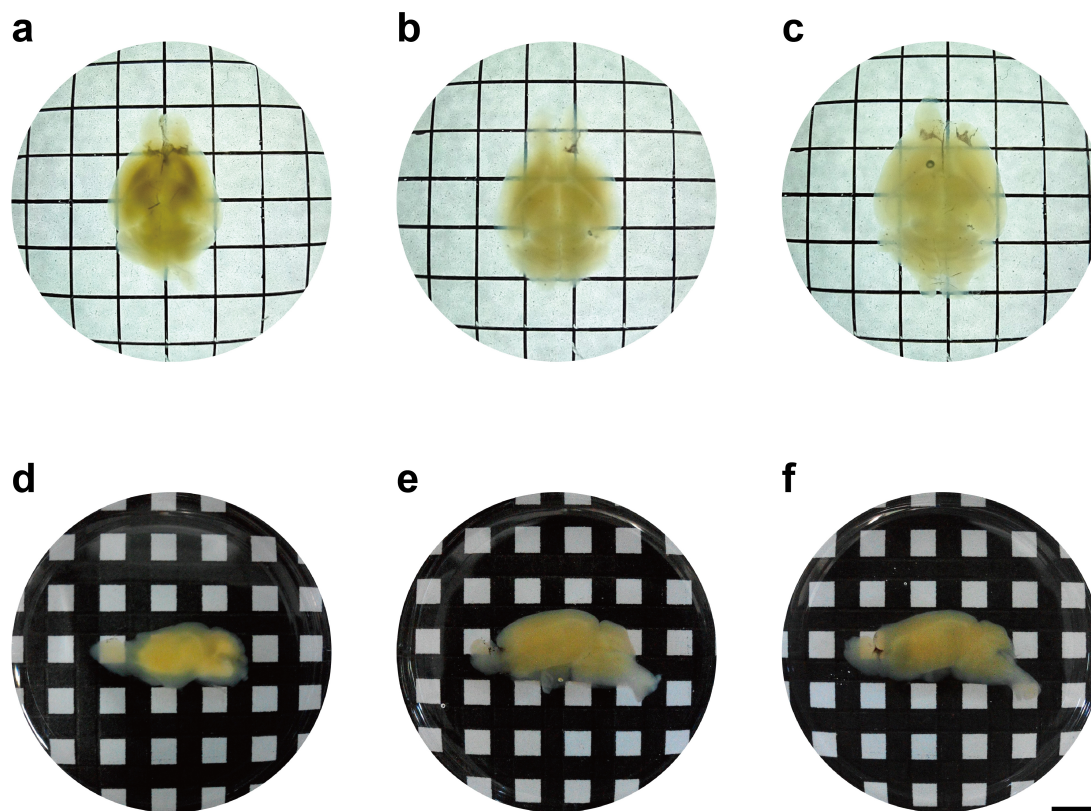

**Fig. S1.** Development of FOCM by reagent concentration screening. (a) Whole brain treatment with 32% urea, 58% DMSO and 1% TritonX-100 for 48 h. (b) Whole brain treatment with 35% urea, 64% DMSO and 1% TritonX-100 for 48 h. (c) Whole brain treatment with 35% urea and 65% DMSO for 48 h. (d) Hemisphere treatment with 35% sorbitol, 15%urea and 5% glycerol dissolving in DMSO. (e) Hemisphere treatment with 30% sorbitol, 20%urea and 1% glycerol dissolving in DMSO. (f) Hemisphere treatment with 30% sorbitol, 20%urea and 3% glycerol dissolving in DMSO. Scale bar represents 5 mm.

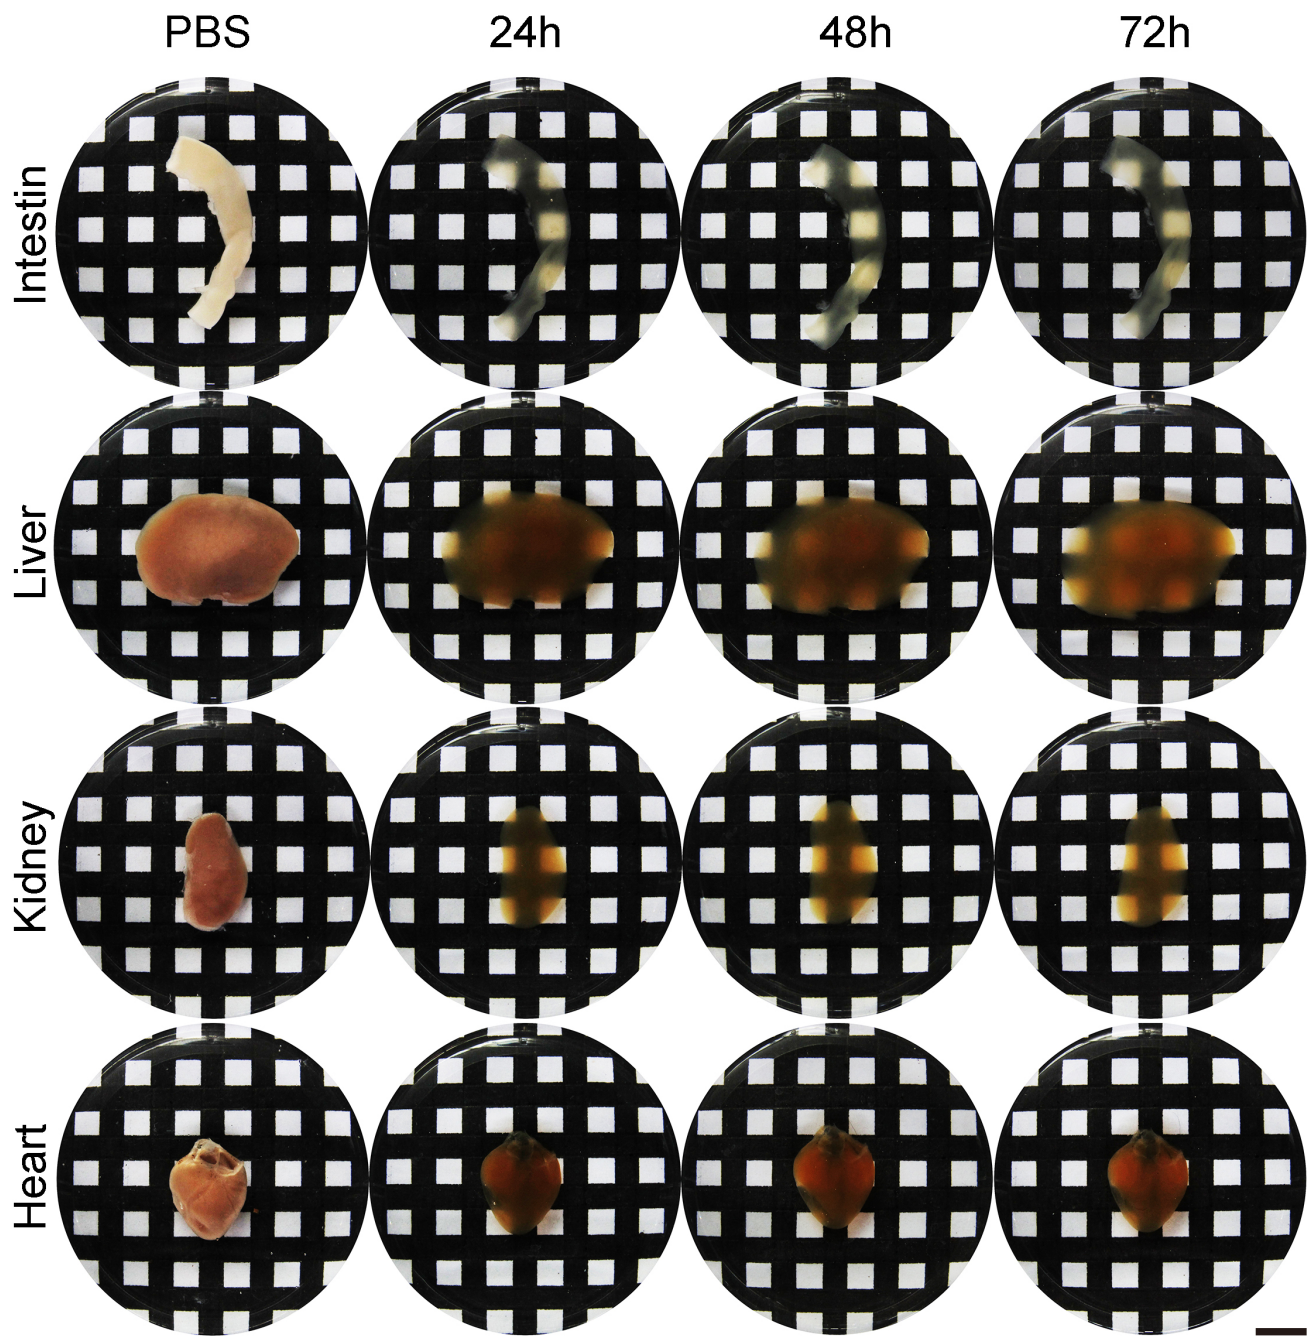

**Fig. S2.** Rapid organs clearing with FOCM. Rapid clearing of organs including intestine, liver, kidney and heart within 72 hours in an adult C57BL/6 mouse (9 weeks old). Scale bar represents 5 mm.

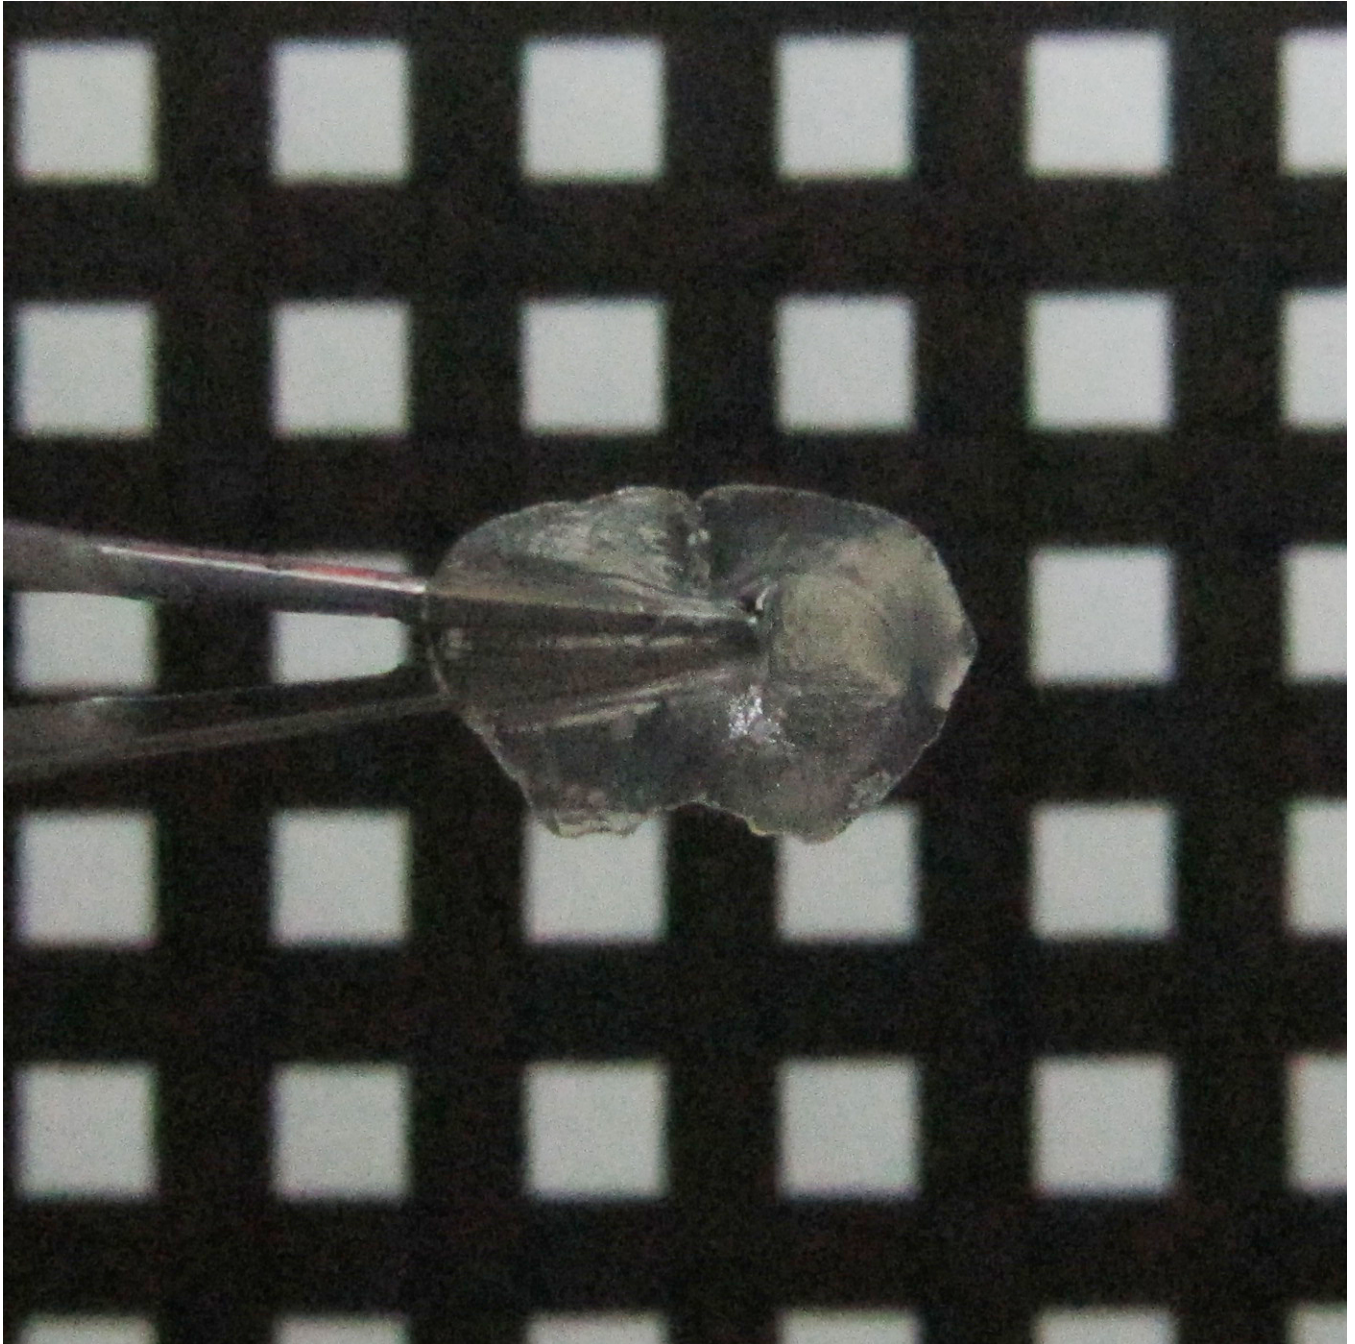

**Fig. S3.** The 200- $\mu\text{m}$ -thick brain slice cleared by FOCM became firm enough to be moved by tweezers without any distortion.

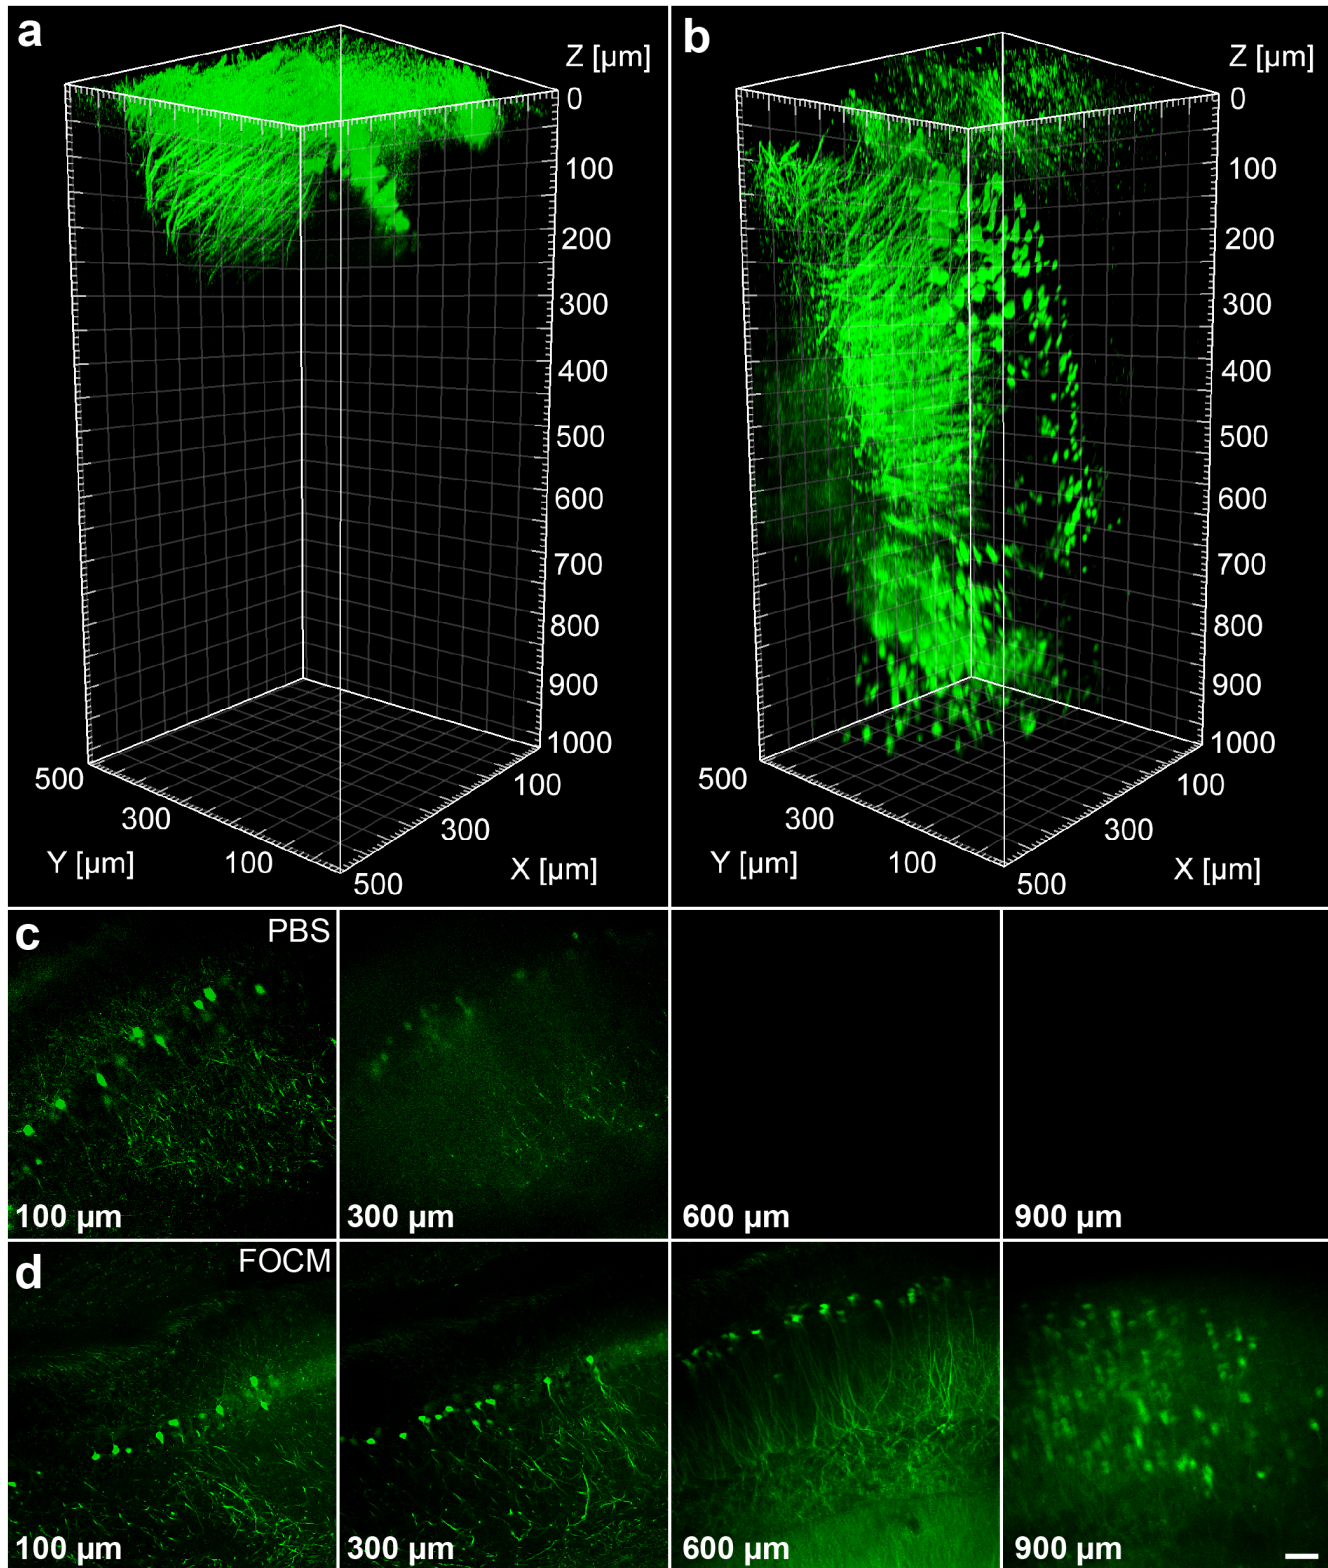

**Fig. S4.** FOCM improved imaging depth of two-photon excitation microscopy. (a) The reconstruction with two-photon excitation microscopy before FOCM clearing. (b) The reconstruction after FOCM clearing. (c) Selected single imaging with two-photon microscopy at the depth of 100  $\mu\text{m}$ , 300  $\mu\text{m}$ , 600  $\mu\text{m}$ , 900  $\mu\text{m}$  in Z-axis before clearing. (d) Selected imaging with two-photon microscopy after clearing. Scale bar represents 50  $\mu\text{m}$ .

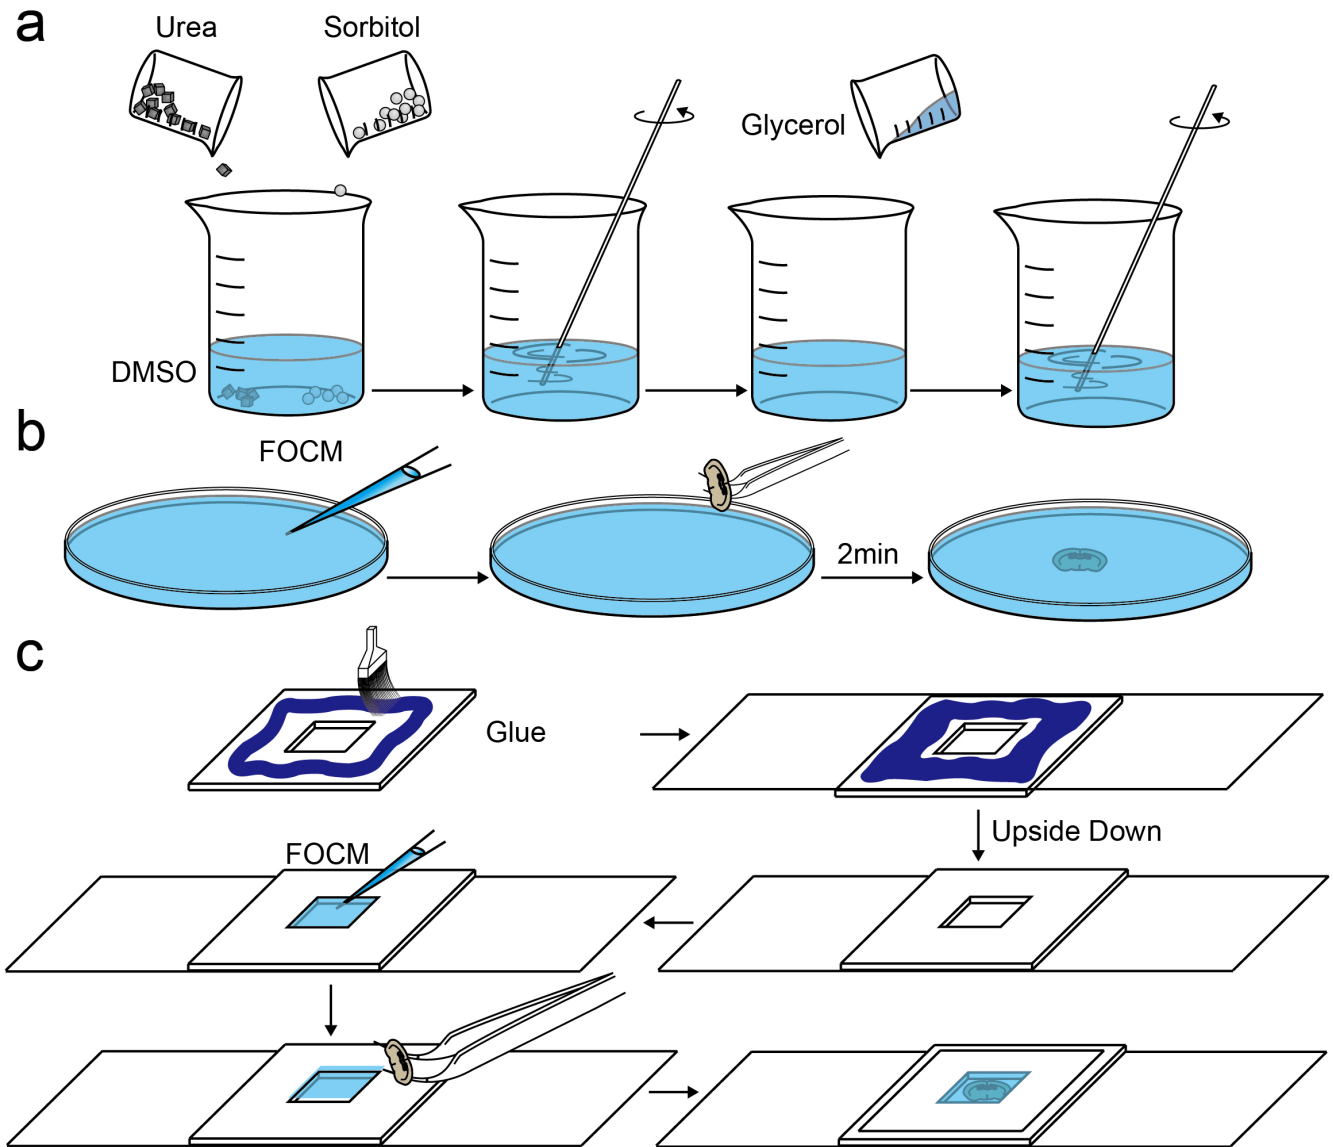

**Fig. S5.** Schematic diagram of sample clearing process with FOCM. (a) Reagents preparation of FOCM. (b) Biological sample clearing process. (c) Sample mounting procedure before optical imaging.

- 12 **Movie S1.** FOCM realized a fast optical clearing within 2 minutes.
- 13 **Movie S2.** 3D visualization of C57BL/6 mouse brain slices immunostained for astrocyte.
- 14 **Movie S3.** 3D visualization of C57BL/6 mouse brain slices immunostained for microglia.
- 15 **Movie S4.** 3D visualization of Thy1-GFP-M mouse brain slices immunostained for the blood vessel (red) and  
16 astrocytes (silver).
